# Supplementary material for: Mn2+ doped CdAl2O4 phosphors with new structure and special fluorescence properties: experimental and theoretical analysis
Source: Royal Society of Chemistry journal article supplement (doi:10.1039/c7ra01623a), 2017-01-01
Supplement: c7ra01623a1.pdf [file c7ra01623a1.pdf]

## Supporting information

### **Mn<sup>2+</sup> doped CdAl<sub>2</sub>O<sub>4</sub> Phosphors with New Structure and Special Fluorescence Properties: Experimental and Theoretical Analysis**

Weiguang Ran,<sup>†</sup> Lili Wang,<sup>†</sup> Qingzhi Liu,<sup>†</sup> Guangzeng Liu,<sup>‡,§</sup> Dan Qu,<sup>†</sup> Xiaohua Pan,<sup>†</sup>

Jinsheng Shi<sup>\*†</sup>

<sup>†</sup>Qingdao Agricultural University, Qingdao 266109, People's Republic of China.

<sup>‡</sup>State Key Laboratory of Crystal Materials, Shandong University, Jinan 250100, People's Republic of China.

<sup>§</sup>College of Chemistry and Chemical Engineering, Qilu Normal University, Jinan, 250013, PR China.

### *Details of the Crystal structure refinements*

In our study, the  $\text{Zn}_2\text{SiO}_4$  (ICSD-67235) phase can be defined as the original structural model for the refinement of the  $\text{CdAl}_2\text{O}_4$  and  $\text{CdAl}_2\text{O}_4:\text{Mn}^{2+}$  sample due to their similar trigonal structure with the space group R-3 (148). The  $\text{CdAl}_2\text{O}_4$  structure model was coming from the  $\text{Zn}_2\text{SiO}_4$  structural through substituting eighteen  $\text{Cd}^{2+}$  atoms for  $\text{Si}^{4+}$ , and substituting thirty-six  $\text{Al}^{3+}$  atoms for  $\text{Zn}^{2+}$ . The single-phase of  $\text{CdAl}_2\text{O}_4$  and  $\text{CdAl}_2\text{O}_4:\text{Mn}^{2+}$  powders were successfully synthesized in this study, crystallized with the space group of R-3 (148). All atom positions, fraction factors, and temperature factors were refined to convergence and satisfied the reflection conditions well. For pure  $\text{CdAl}_2\text{O}_4$  phosphor, the cell parameter is  $a = b = 14.2210 \text{ \AA}$ ,  $c = 9.5733 \text{ \AA}$ ,  $V = 1676.69 \text{ \AA}^3$ . The final refinement converged with weighted profiles of  $R_p = 6.03\%$ ,  $R_{wp} = 8.41\%$  and  $\chi^2 = 2.624$ , which illustrates there is no detectable impurity phase observed in this obtained sample.

### *Details of the calculation*

The CASTEP program was employed to perform geometry optimization using the generalized gradient approximation (GGA) by the Perdew-Burke-Ernzerhof (PBE)<sup>1, 2</sup> formulation. In this calculation, the structure models of CdAl<sub>2</sub>O<sub>4</sub> and CdAl<sub>2</sub>O<sub>4</sub>:Mn<sup>2+</sup> phosphors were based on the pure CdAl<sub>2</sub>O<sub>4</sub> host which was optimized by GSAS program. One of the eighteen Cd atomics was substituted by Mn in CdAl<sub>2</sub>O<sub>4</sub> unit cell. During the geometry optimization, the atomic positions were optimized. The cutoff energy was 480 eV, and Brillouin zone integration was represented using the K point sampling scheme of a 5×5×5 Monkhorst–Pack grid. The convergence tolerance for geometry optimization was  $5.0 \times 10^{-6}$  eV per atom, the maximal ionic Hellmann–Feynman force was  $1.0 \times 10^{-2}$  eV Å<sup>-1</sup>, the stress tensor was  $2.0 \times 10^{-2}$  GPa and the maximal displacement being within  $5.0 \times 10^{-4}$  Å.

Table S1. Optimized structural parameters of CdAl<sub>2</sub>O<sub>4</sub> obtained from the Geometry Optimization.

| Element Symbol | Mult. Wyck. | x/a     | y/b     | z/c     |
|----------------|-------------|---------|---------|---------|
| Cd1            | 18f         | 0.20085 | 0.17768 | 0.24733 |
| Al1            | 18f         | 0.21058 | 0.19950 | 0.58281 |
| Al2            | 18f         | 0.21741 | 0.19911 | 0.91728 |
| O1             | 18f         | 0.34060 | 0.34362 | 0.25124 |
| O2             | 18f         | 0.22125 | 0.11287 | 0.04551 |
| O3             | 18f         | 0.21775 | 0.11774 | 0.45330 |
| O4             | 18f         | 0.18963 | 0.13848 | 0.74960 |

<sup>a</sup> a=b=14.2150 , c=9.5700 ,  $\alpha=\beta=90^\circ$ ,  $\gamma=120^\circ$ , V=1674.70 Å<sup>3</sup> Space group R-3

Table S2. Refined structural parameters of CdAl<sub>2</sub>O<sub>4</sub>:0.03Mn<sup>2+</sup> obtained from the Rietveld refinement.

| Element Symbol | Mult. Wyck. | x/a     | y/b     | z/c     | S.O.F. | U(Å <sup>2</sup> ) |
|----------------|-------------|---------|---------|---------|--------|--------------------|
| Cd1            | 18f         | 0.20600 | 0.18360 | 0.24629 | 0.972  | 0.0089             |
| Mn             | 18f         | 0.20600 | 0.18360 | 0.24629 | 0.028  | 0.0900             |
| Al1            | 18f         | 0.20835 | 0.19826 | 0.5832  | 1.000  | 0.0040             |
| Al2            | 18f         | 0.2179  | 0.19712 | 0.9165  | 1.000  | 0.0096             |
| O1             | 18f         | 0.3427  | 0.3457  | 0.2575  | 1.000  | 0.0065             |
| O2             | 18f         | 0.2201  | 0.1110  | 0.0474  | 1.000  | 0.0008             |
| O3             | 18f         | 0.2147  | 0.1200  | 0.4480  | 1.000  | 0.0219             |
| O4             | 18f         | 0.1934  | 0.1377  | 0.7463  | 1.000  | 0.0163             |

<sup>a</sup> a=b=14.219 , c=9.5718 ,  $\alpha=\beta=90^\circ$ ,  $\gamma=120^\circ$ , V=1675.59 Å<sup>3</sup>, Space group R-3, R<sub>wp</sub>= 6.98%,

R<sub>exp</sub>=5.42%,  $\chi^2= 1.800$ .

**Figure S1**

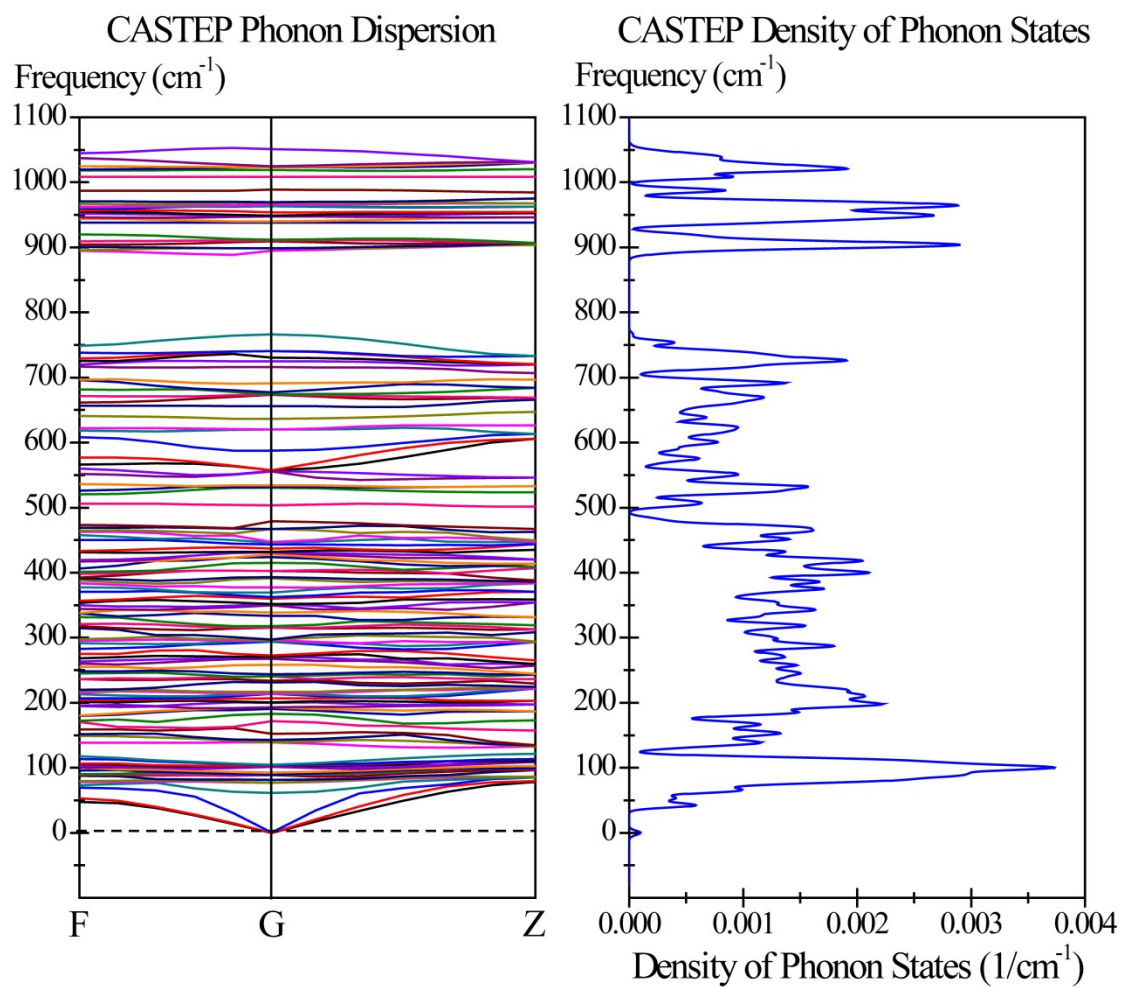

**Fig. S1** Calculated phonon dispersion and density of phonon states curves.

**Figure S2**

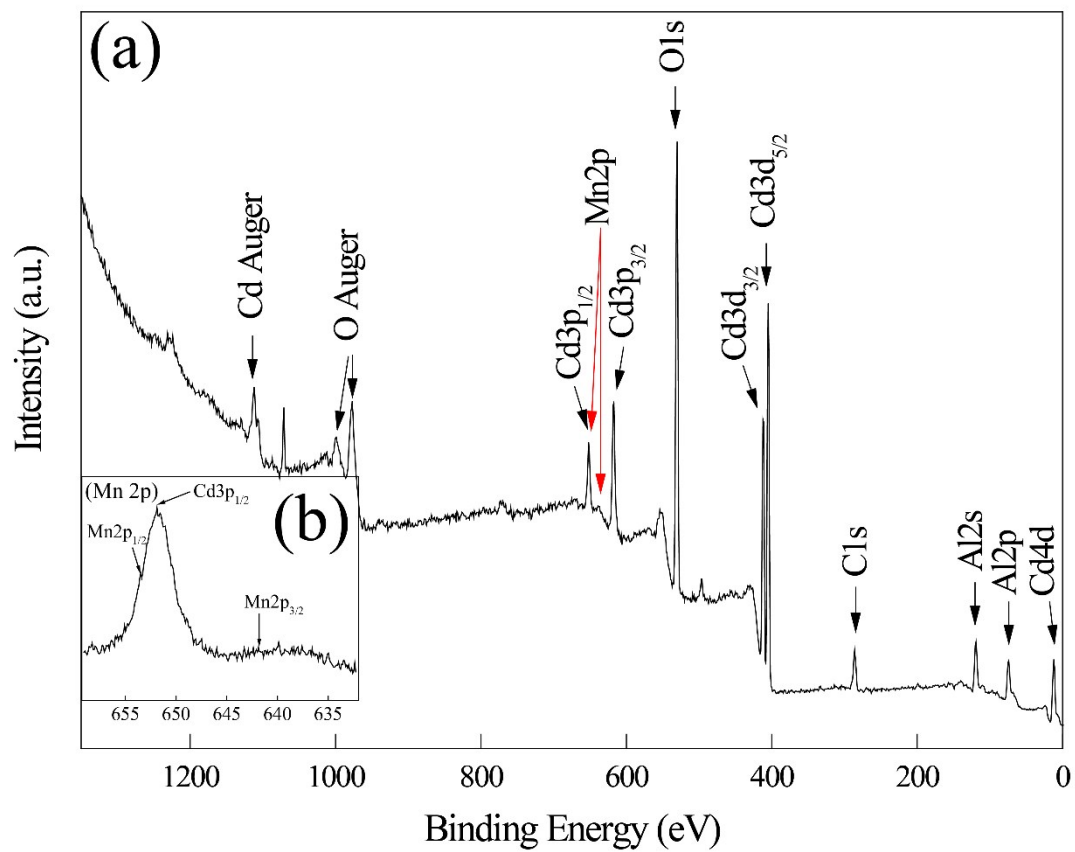

**Fig. S2** XPS Spectrum of  $\text{CdAl}_2\text{O}_4:0.01\text{Mn}^{2+}$  (a) survey scan and (b) high-resolution scan of the Mn2p region.

**Figure S3**

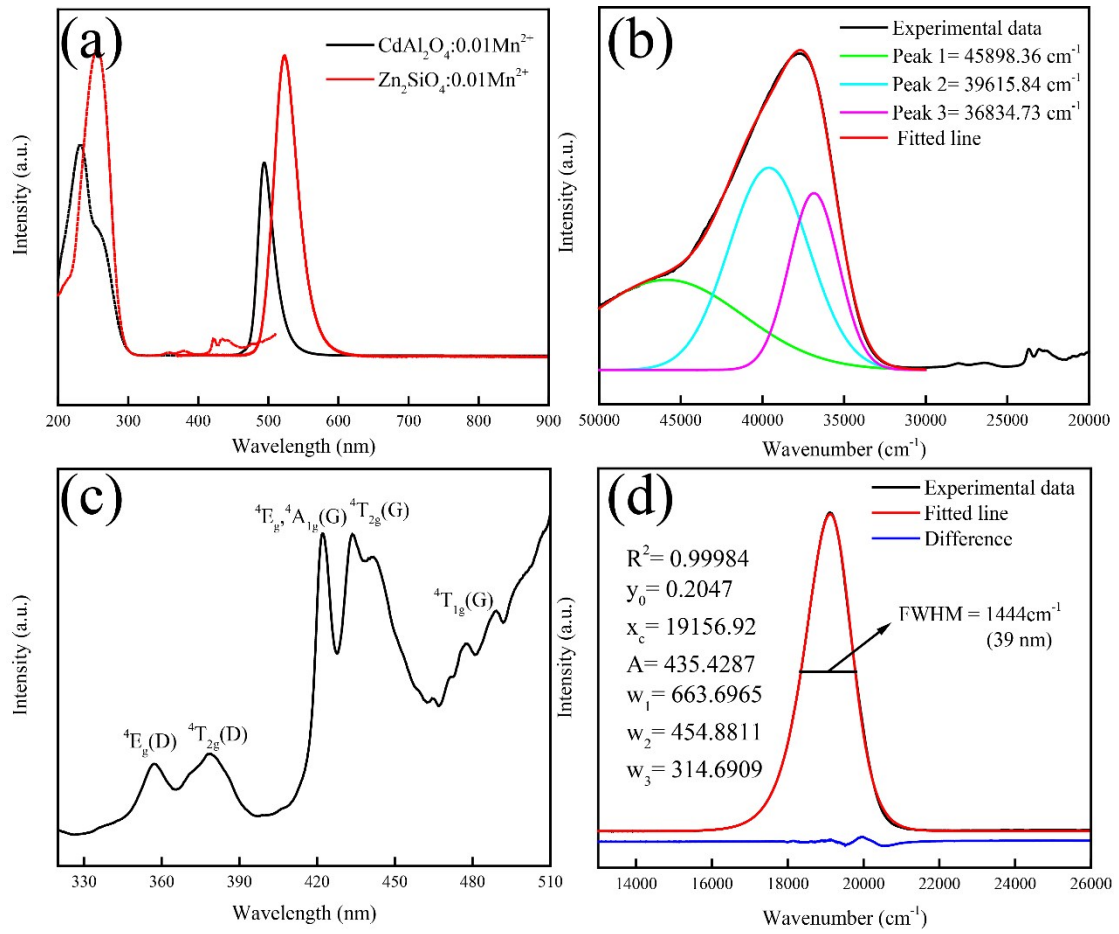

**Fig. S3** Excitation and emission spectra of as prepared  $\text{Zn}_2\text{SiO}_4:0.01\text{Mn}^{2+}$  phosphor.



**Figure S4**

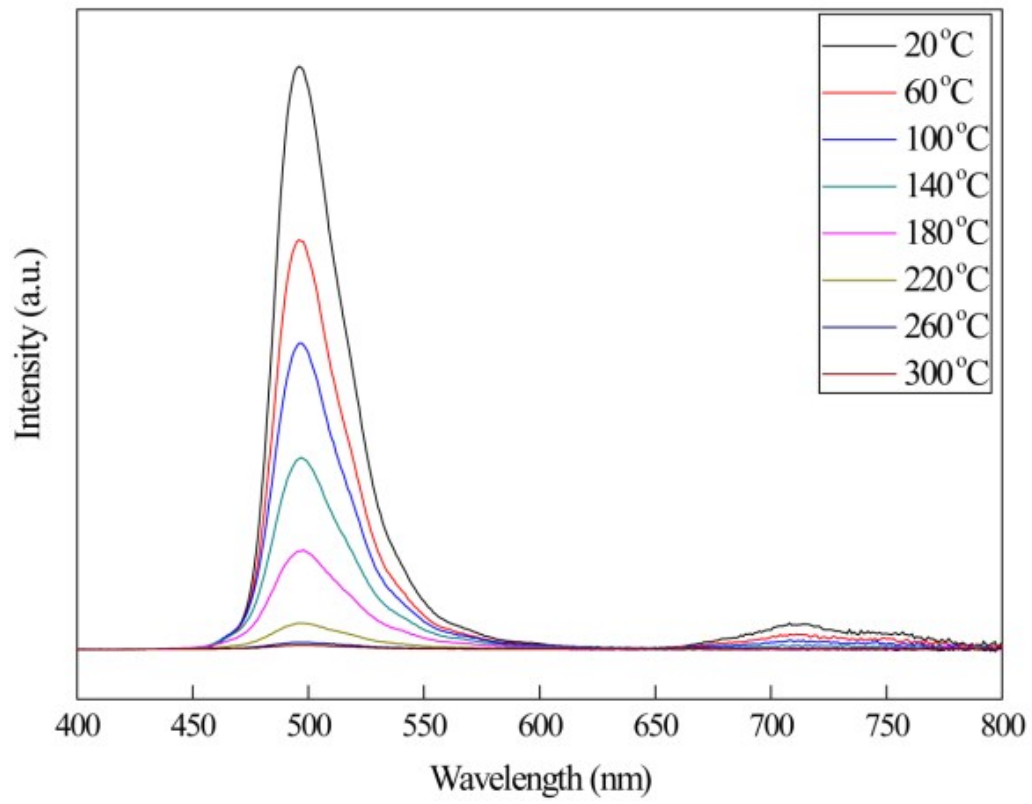

**Fig.S4** The temperature-dependent emission intensity of the optimized  $\text{CdAl}_2\text{O}_4:0.015\text{Mn}^{2+}$  phosphor.

**Figure S5**

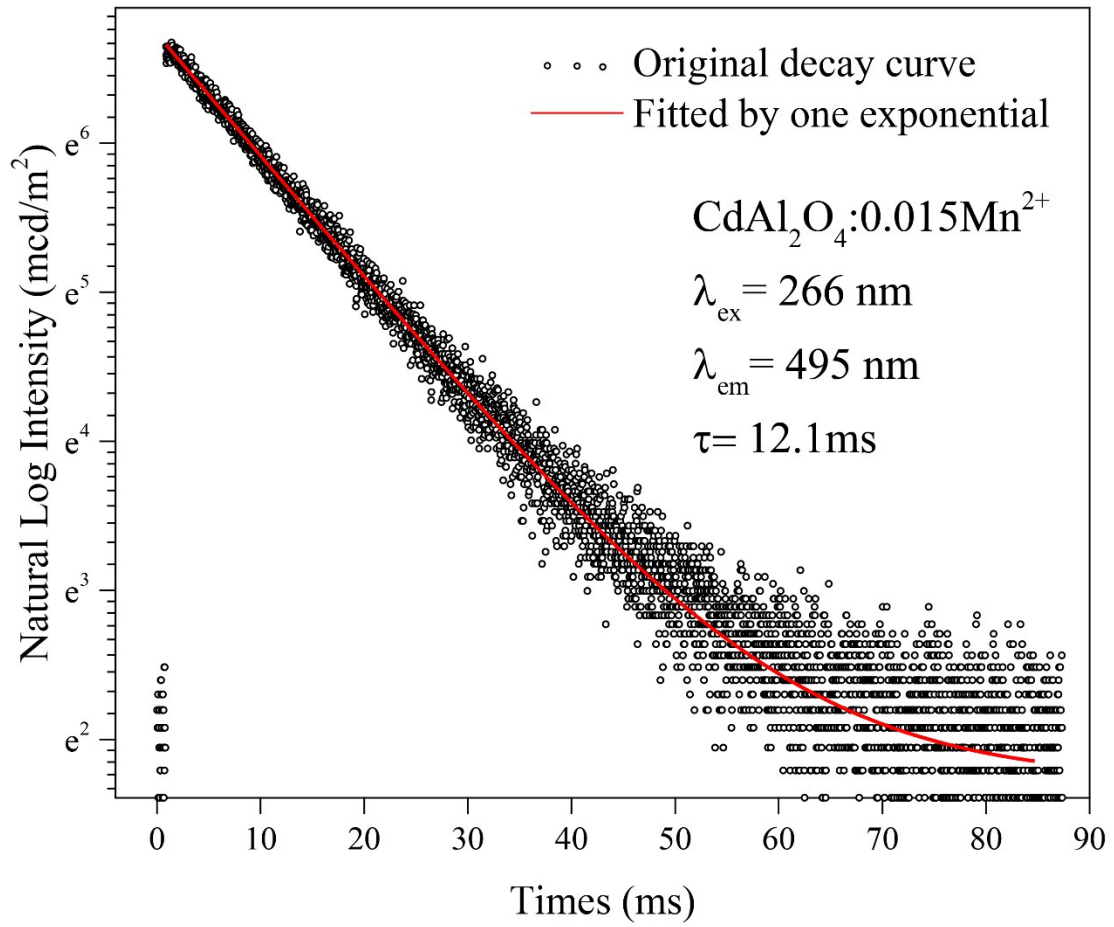

**Fig.S5** Decay curves of  $\text{Mn}^{2+}$ -doped  $\text{CdAl}_2\text{O}_4$  phosphor excited at 230 nm and monitored at 495 nm.

## Figure S6

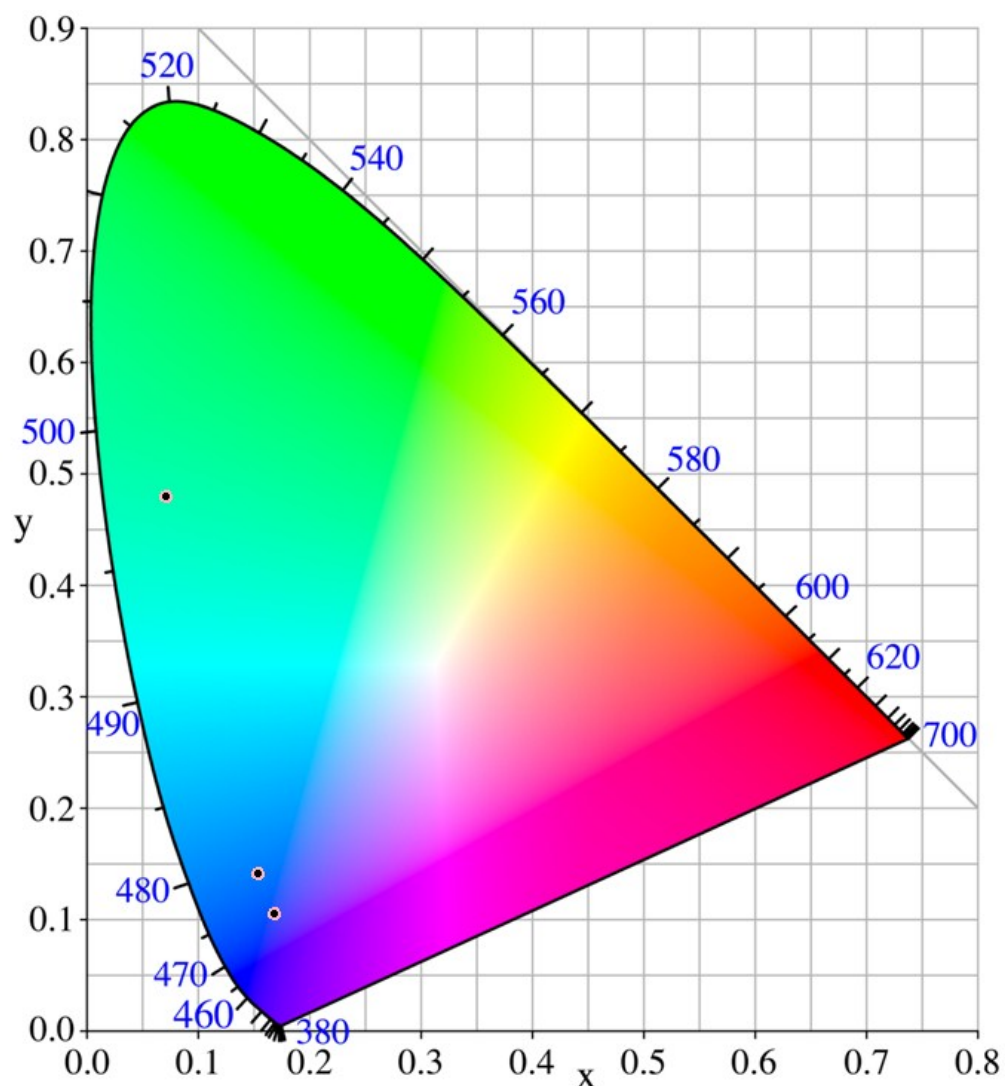

**Fig. S6** CIE chromaticity diagram of  $\text{CdAl}_2\text{O}_4$ ,  $\text{CdAl}_2\text{O}_4:0.0005\text{Mn}^{2+}$  and  $\text{CdAl}_2\text{O}_4:0.015\text{Mn}^{2+}$  phosphors excited at about 230 nm.

1. M. D. Segall, J. D. L. Philip, M. J. Probert, C. J. Pickard, P. J. Hasnip, S. J. Clark and M. C. Payne, *First-principles simulation: ideas, illustrations and the CASTEP code*, *J Phys: Condens Mat.* 2002, **14**, 2717.
2. J. P. Perdew, K. Burke and M. Ernzerhof, *Generalized Gradient Approximation Made Simple*, *Phys Rev Lett.* 1996, **77**, 3865-3868.
